# Supplementary material
Source: PubMed Central journal article supplement (PMC3525813)
Supplement: NIHMS399260-supplement-02.pdf [file NIHMS399260-supplement-02.pdf]

**Table S1.** Meta-regression analyses examining the association of the ESA dose (per erythropoietin- $\alpha$  equivalent 10,000 units/week increment), target and achieved hemoglobin, with all-cause and cardiovascular mortality.

| <i>Outcome</i> / predictor                  | Unadjusted                   |                   | Adjusted for target hemoglobin |                   | Adjusted for first-3-month achieved mean hemoglobin |                   |
|---------------------------------------------|------------------------------|-------------------|--------------------------------|-------------------|-----------------------------------------------------|-------------------|
|                                             | No. trials<br>(No. patients) | IRR (95% CI)      | No. trials<br>(No. patients)   | IRR (95% CI)      | No. trials<br>(No. patients)                        | IRR (95% CI)      |
| <i>All-cause mortality</i>                  |                              |                   |                                |                   |                                                     |                   |
| First-3-month mean ESA dose                 | 11                           | 1.42 (1.10, 1.83) | 10                             | 1.71 (0.90, 3.24) | 11                                                  | 1.48 (1.02, 2.14) |
| Target hemoglobin                           | (4565)                       | –                 | (4385)                         | 0.96 (0.86, 1.08) | (4565)                                              | –                 |
| First-3-month achieved mean hemoglobin      |                              | –                 |                                | –                 |                                                     | 0.95 (0.68, 1.32) |
| Total-study-period mean ESA dose            | 21                           | 1.09 (1.02, 1.18) | 21                             | 1.41 (1.08, 1.82) | 21                                                  | 1.27 (0.97, 1.65) |
| Target hemoglobin                           | (11,285)                     | –                 | (11,105)                       | 0.91 (0.82, 1.00) | (11,285)                                            | –                 |
| Total-study-period achieved mean hemoglobin |                              | –                 |                                | –                 |                                                     | 0.89 (0.73, 1.09) |
| <i>Cardiovascular mortality</i>             |                              |                   |                                |                   |                                                     |                   |
| First-3-month mean ESA dose                 | 6                            | 1.31 (0.92, 1.86) | 5                              | Not performed *   | 6                                                   | Not performed *   |
| Target hemoglobin                           | (2085)                       | –                 | (1979)                         | Not performed *   | (2085)                                              | –                 |
| First-3-month achieved mean hemoglobin      |                              | –                 |                                | –                 |                                                     | Not performed *   |
| Total-study-period mean ESA dose            | 10                           | 1.07 (0.97, 1.17) | 10                             | Not performed †   | 10                                                  | 1.38 (0.93, 2.03) |
| Target hemoglobin                           | (7148)                       | –                 | (7042)                         | Not performed †   | (7148)                                              | –                 |
| Total-study-period achieved mean hemoglobin |                              | –                 |                                | –                 |                                                     | 0.81 (0.60, 1.10) |

\* The analysis was not performed due to insufficient observations. † The analysis was not performed due to collinearity. IRR, incidence rate ratio.
